# Supplementary material for: 3,4-Methylenedioxymethamphetamine-assisted psychotherapy for treatment of chronic posttraumatic stress disorder: A randomized phase 2 controlled trial
Source: PubMed Central journal article supplement — J Psychopharmacol. 2018 Oct 29;32(12):1295–307. doi: 10.1177/0269881118806297 (PMC6247454; doi:10.1177/0269881118806297), 2018-10-29
Supplement: JOP806297__supplemental_material.pdf [file JOP806297__supplemental_material.pdf]

## **Supplemental Content**

### **12-month Follow-up Psychiatric Medications and Therapy**

At the 12-month follow-up visit (n=25), 10 (40.0%) participants reporting taking psychiatric medication(s); all 10 participants had taken psychiatric drugs before study participation. The number of participants prescribed a medication for a given indication was as follows: 1 (4.0%) for PTSD, 2 (8.0%) for depression, 3 (12.0%) for generalized anxiety disorder (GAD), 5 (20%) for insomnia, 1 (4.0%) for ADHD, 1 (4.0%) anxiety/sleep disturbance, 1 (4.0%) for occasional anxiety. Of these, two participants were taking medications for multiple indications - one person reported taking five medications, including for depression, insomnia, GAD; another was taking four medications, including for ADHD, insomnia, and GAD. The only individual taking a medication at 12-month follow-up for PTSD was taking Lithium, which had been tapered off after study enrollment. This person had a CAPS-IV Total score of 78 (Baseline) and 10 (12-month follow-up). Eleven participants were in therapy, with only one being in the same type of therapy as before the study participation.

**Table S1. Treatment-Emergent Adverse Events during Blinded, Open-label, and 12-month Follow-up Segments <sup>†</sup>, Intent-to-Treat Set**

| <b>System Organ Classes</b>                          | <b>40 mg MDMA<br/>(n = 6)</b> | <b>100 mg MDMA<br/>(n = 9)</b> | <b>125 mg MDMA<br/>(n = 13)</b> | <b>Open-Label MDMA<br/>(n = 26)</b> | <b>12-month Follow-up <sup>††</sup><br/>(n = 25)</b> |
|------------------------------------------------------|-------------------------------|--------------------------------|---------------------------------|-------------------------------------|------------------------------------------------------|
| Cardiac disorders                                    | ---                           | ---                            | ---                             | ---                                 | ---                                                  |
| Ear and labyrinth disorders                          | ---                           | ---                            | ---                             | ---                                 | ---                                                  |
| Endocrine disorders                                  | ---                           | ---                            | ---                             | ---                                 | ---                                                  |
| Eye disorders                                        | ---                           | 1 (11.1)                       | ---                             | 1 (3.8)                             | ---                                                  |
| Gastrointestinal disorders                           | ---                           | ---                            | 4 (30.8)                        | 1 (3.8)                             | ---                                                  |
| General disorders and administration site conditions | 1 (16.7)                      | 1 (11.1)                       | 2 (15.4)                        | 1 (3.8)                             | ---                                                  |
| Infections and infestations                          | ---                           | ---                            | ---                             | ---                                 | ---                                                  |
| Injury, poisoning and procedural complications       | ---                           | 2 (22.2)                       | ---                             | ---                                 | 1 (4.0)                                              |
| Metabolism and nutrition disorders                   | ---                           | ---                            | ---                             | ---                                 | ---                                                  |
| Musculoskeletal and connective tissue disorders      | ---                           | ---                            | 3 (23.1)                        | 3 (11.5)                            | ---                                                  |
| Nervous system disorders                             | ---                           | ---                            | ---                             | 2 (7.7)                             | ---                                                  |
| Neoplasms benign, malignant and unspecified          | ---                           | ---                            | ---                             | 1 (3.8)                             | ---                                                  |
| Psychiatric disorders                                | ---                           | 3 (33.3)                       | 4 (30.8)                        | 4 (15.4)                            | 3 (12.0)                                             |
| Reproductive system and breast disorders             | ---                           | ---                            | ---                             | ---                                 | 1 (4.0)                                              |
| Respiratory, thoracic and mediastinal disorders      | ---                           | ---                            | ---                             | ---                                 | ---                                                  |
| Skin and subcutaneous tissue disorders               | ---                           | ---                            | ---                             | ---                                 | ---                                                  |
| Vascular disorders                                   | ---                           | 1 (11.1)                       | ---                             | 1 (3.8)                             | ---                                                  |

<sup>†</sup> Frequency of participants reporting adverse events, each participant counted once per system organ class at each segment

<sup>††</sup> After End of Stage 1 (100 mg and 125 mg) or Stage 2 (40 mg) only serious AEs and AEs that affected psychiatric status were collected.

**Table S2. Vital Signs during Experimental Sessions, Intent-to-Treat Set**

| Measurement                            | 40 mg<br>MDMA<br>(n = 6) | 100 mg<br>MDMA<br>(n = 9) | 125 mg<br>MDMA<br>(n = 13) | Open Label<br>(100-125 mg)<br>(n = 26) |
|----------------------------------------|--------------------------|---------------------------|----------------------------|----------------------------------------|
| <b>Systolic Blood Pressure (mmHg)</b>  |                          |                           |                            |                                        |
| Pre-drug                               |                          |                           |                            |                                        |
| Mean (SD)                              | 124.7 (14.14)            | 121.4 (20.16)             | 127.6 (14.04)              | 127.4 (15.56)                          |
| Min/Max                                | 100/154                  | 96/161                    | 108/165                    | 100/164                                |
| Peak                                   |                          |                           |                            |                                        |
| Mean (SD)                              | 134.3 (15.47)            | 138.6 (23.55)             | 150.0 (17.52)              | 147.9 (19.37)                          |
| Min/Max                                | 112/163                  | 100/180                   | 114/181                    | 105/178                                |
| Final                                  |                          |                           |                            |                                        |
| Mean (SD)                              | 123.6 (12.52)            | 116.7 (13.50)             | 122.5 (15.87)              | 124.6 (17.16)                          |
| Min/Max                                | 107/148                  | 92/140                    | 86/160                     | 86/158                                 |
| <b>Diastolic Blood Pressure (mmHg)</b> |                          |                           |                            |                                        |
| Pre-drug                               |                          |                           |                            |                                        |
| Mean (SD)                              | 80.0 (9.96)              | 79.0 (13.45)              | 81.6 (8.90)                | 80.3 (10.01)                           |
| Min/Max                                | 62/95                    | 58/102                    | 54/98                      | 56/97                                  |
| Peak                                   |                          |                           |                            |                                        |
| Mean (SD)                              | 86.1 (9.28)              | 84.4 (11.38)              | 92.9 (13.07)               | 90.2 (10.94)                           |
| Min/Max                                | 72/96                    | 65/101                    | 70/135                     | 64/112                                 |
| Final                                  |                          |                           |                            |                                        |
| Mean (SD)                              | 79.9 (9.74)              | 74.4 (7.72)               | 77.4 (10.96)               | 78.5 (10.87)                           |
| Min/Max                                | 68/96                    | 61/88                     | 53/99                      | 54/100                                 |
| <b>Heart Rate (Beats Per Minute)</b>   |                          |                           |                            |                                        |
| Pre-drug                               |                          |                           |                            |                                        |
| Mean (SD)                              | 79.1 (11.00)             | 70.8 (17.40)              | 73.9 (17.55)               | 79.4 (14.71)                           |
| Min/Max                                | 66/103                   | 46/118                    | 50/115                     | 56/116                                 |
| Peak                                   |                          |                           |                            |                                        |
| Mean (SD)                              | 87.5 (11.51)             | 97.0 (21.50)              | 105.8 (17.38)              | 104.5 (17.87)                          |
| Min/Max                                | 69/103                   | 65/140                    | 73/160                     | 63/143                                 |
| Final                                  |                          |                           |                            |                                        |
| Mean (SD)                              | 80.1 (15.50)             | 81.4 (13.21)              | 87.4 (16.15)               | 85.8 (13.65)                           |
| Min/Max                                | 56/103                   | 63/114                    | 59/120                     | 60/120                                 |
| <b>Body Temperature (°C)</b>           |                          |                           |                            |                                        |
| Pre-drug                               |                          |                           |                            |                                        |
| Mean (SD)                              | 36.4 (0.50)              | 35.9 (1.0)                | 36.3 (0.52)                | 36.2 (0.74)                            |
| Min/Max                                | 35.8/37.2                | 33.9/37.9                 | 35.4/37.2                  | 34.3/37.5                              |
| Peak                                   |                          |                           |                            |                                        |
| Mean (SD)                              | 37.1 (0.33)              | 37.0 (0.64)               | 37.2 (0.35)                | 37.1 (0.54)                            |
| Min/Max                                | 36.6/37.6                | 35.5/38.7                 | 36.5/37.8                  | 36.0/38.5                              |
| Final                                  |                          |                           |                            |                                        |
| Mean (SD)                              | 37.0 (0.38)              | 36.5 (0.74)               | 36.8 (0.45)                | 36.7 (0.62)                            |
| Min/Max                                | 36.5/37.6                | 34.8/38.1                 | 35.9/37.5                  | 35.2/37.8                              |

**Table S3. Suicidal Ideation and Behavior across the Treatment Period and Endpoints <sup>†</sup>, Intent-to-Treat Set**

| Experimental Session 1 |    |                        |                            |                     |               |               |                     |                     |
|------------------------|----|------------------------|----------------------------|---------------------|---------------|---------------|---------------------|---------------------|
| No. (%)                |    |                        |                            |                     |               |               |                     |                     |
| Dose                   |    | Pre-Drug <sup>††</sup> | During-Drug <sup>†††</sup> | Integration Visit 1 | Contact Day 2 | Contact Day 7 | Integration Visit 2 | Integration Visit 3 |
| 40 mg                  | PI | 0 (0)                  | 0 (0)                      | 0 (0)               | 0 (0)         | 0 (0)         | 1 (16.7)            | 2 (40.0)            |
|                        | SI | 0 (0)                  | 0 (0)                      | 0 (0)               | 0 (0)         | 0 (0)         | 0 (0)               | 0 (0)               |
|                        | PB | 0 (0)                  | 0 (0)                      | 0 (0)               | 0 (0)         | 0 (0)         | 0 (0)               | 0 (0)               |
|                        | N  | 6                      | 6                          | 6                   | 6             | 6             | 6                   | 5                   |
| 100 mg                 | PI | 5 (55.6)               | 2 (22.2)                   | 3 (33.3)            | 3 (33.3)      | 3 (33.3)      | 3 (33.3)            | 5 (55.6)            |
|                        | SI | 0 (0)                  | 0 (0)                      | 0 (0)               | 0 (0)         | 0 (0)         | 0 (0)               | 0 (0)               |
|                        | PB | 0 (0)                  | 0 (0)                      | 0 (0)               | 0 (0)         | 0 (0)         | 0 (0)               | 0 (0)               |
|                        | N  | 9                      | 9                          | 9                   | 9             | 9             | 9                   | 9                   |
| 125 mg                 | PI | 3 (23.1)               | 0 (0)                      | 0 (0)               | 1 (8.3)       | 4 (33.3)      | 4 (33.3)            | 6 (50.0)            |
|                        | SI | 0 (0)                  | 0 (0)                      | 0 (0)               | 0 (0)         | 0 (0)         | 0 (0)               | 0 (0)               |
|                        | PB | 0 (0)                  | 0 (0)                      | 0 (0)               | 0 (0)         | 0 (0)         | 0 (0)               | 0 (0)               |
|                        | N  | 13                     | 13                         | 13                  | 12            | 12            | 12                  | 12                  |
| Experimental Session 2 |    |                        |                            |                     |               |               |                     |                     |
| No. (%)                |    |                        |                            |                     |               |               |                     |                     |
| 40 mg                  | PI | 0 (0)                  | 0 (0)                      | 0 (0)               | 0 (0)         | 0 (0)         | 0 (0)               | 0 (0)               |
|                        | SI | 0 (0)                  | 0 (0)                      | 0 (0)               | 0 (0)         | 0 (0)         | 0 (0)               | 0 (0)               |
|                        | PB | 0 (0)                  | 0 (0)                      | 0 (0)               | 0 (0)         | 0 (0)         | 0 (0)               | 0 (0)               |
|                        | N  | 5                      | 5                          | 5                   | 5             | 5             | 5                   | 5                   |
| 100 mg                 | PI | 3 (33.3)               | 3 (33.3)                   | 3 (33.3)            | 4 (50.0)      | 2 (25.0)      | 3 (42.9)            | 7 (77.8)            |
|                        | SI | 0 (0)                  | 0 (0)                      | 0 (0)               | 0 (0)         | 1 (12.5)      | 0 (0)               | 0 (0)               |
|                        | PB | 0 (0)                  | 0 (0)                      | 0 (0)               | 0 (0)         | 0 (0)         | 0 (0)               | 0 (0)               |
|                        | N  | 9                      | 9                          | 9                   | 8             | 8             | 7                   | 9                   |
| 125 mg                 | PI | 3 (25.0)               | 5 (41.7)                   | 0 (0)               | 3 (25.0)      | 3 (25.0)      | 7 (58.3)            | 9 (75.0)            |
|                        | SI | 0 (0)                  | 0 (0)                      | 0 (0)               | 0 (0)         | 0 (0)         | 0 (0)               | 0 (0)               |
|                        | PB | 0 (0)                  | 0 (0)                      | 0 (0)               | 0 (0)         | 0 (0)         | 0 (0)               | 0 (0)               |
|                        | N  | 12                     | 12                         | 12                  | 12            | 12            | 12                  | 12                  |
| Experimental Session 3 |    |                        |                            |                     |               |               |                     |                     |
| No. (%)                |    |                        |                            |                     |               |               |                     |                     |
| 100 mg                 | PI | 3 (33.3)               | 2 (22.2)                   | 1 (11.1)            | 2 (25.0)      | 1 (11.1)      | 3 (33.3)            | 3 (33.3)            |
|                        | SI | 0 (0)                  | 0 (0)                      | 0 (0)               | 0 (0)         | 1 (11.1)      | 0 (0)               | 0 (0)               |
|                        | PB | 0 (0)                  | 0 (0)                      | 0 (0)               | 0 (0)         | 0 (0)         | 0 (0)               | 0 (0)               |
|                        | N  | 9                      | 9                          | 9                   | 8             | 9             | 9                   | 9                   |
| 125 mg                 | PI | 1 (8.3)                | 3 (25.0)                   | 1 (8.3)             | 2 (16.7)      | 2 (16.7)      | 1 (10.0)            | 4 (33.3)            |
|                        | SI | 0 (0)                  | 0 (0)                      | 0 (0)               | 0 (0)         | 0 (0)         | 0 (0)               | 0 (0)               |
|                        | PB | 0 (0)                  | 0 (0)                      | 0 (0)               | 0 (0)         | 0 (0)         | 0 (0)               | 0 (0)               |
|                        | N  | 12                     | 12                         | 12                  | 12            | 11            | 10                  | 12                  |
| Experimental Session 4 |    |                        |                            |                     |               |               |                     |                     |
| No. (%)                |    |                        |                            |                     |               |               |                     |                     |
| 40 mg/<br>Open-label   | PI | 0 (0)                  | 1 (20.0)                   | 1 (20.0)            | 1 (20.0)      | 0 (0)         | 0 (0)               | 1 (20.0)            |
|                        | SI | 0 (0)                  | 1 (20.0)                   | 1 (20.0)            | 1 (20.0)      | 0 (0)         | 0 (0)               | 0 (0)               |
|                        | PB | 0 (0)                  | 0 (0)                      | 0 (0)               | 0 (0)         | 0 (0)         | 0 (0)               | 0 (0)               |
|                        | N  | 5                      | 5                          | 5                   | 5             | 4             | 5                   | 5                   |
| Experimental Session 5 |    |                        |                            |                     |               |               |                     |                     |
| No. (%)                |    |                        |                            |                     |               |               |                     |                     |
| 40 mg/<br>Open-label   | PI | 0 (0)                  | 0 (0)                      | 0 (0)               | 0 (0)         | 0 (0)         | 0 (0)               | 0 (0)               |
|                        | SI | 0 (0)                  | 0 (0)                      | 0 (0)               | 0 (0)         | 0 (0)         | 0 (0)               | 0 (0)               |
|                        | PB | 0 (0)                  | 0 (0)                      | 0 (0)               | 0 (0)         | 0 (0)         | 0 (0)               | 0 (0)               |
|                        | N  | 5                      | 5                          | 5                   | 5             | 5             | 5                   | 5                   |
| Experimental Session 6 |    |                        |                            |                     |               |               |                     |                     |
| No. (%)                |    |                        |                            |                     |               |               |                     |                     |
| 40 mg/<br>Open-label   | PI | 1 (33.3)               | 0 (0)                      | 0 (0)               | 0 (0)         | 0 (0)         | 1 (25.0)            | 0 (0)               |
|                        | SI | 0 (0)                  | 0 (0)                      | 0 (0)               | 0 (0)         | 0 (0)         | 0 (0)               | 0 (0)               |
|                        | PB | 0 (0)                  | 0 (0)                      | 0 (0)               | 0 (0)         | 0 (0)         | 0 (0)               | 0 (0)               |
|                        | N  | 3                      | 3                          | 4                   | 4             | 4             | 4                   | 4                   |

| Endpoints<br>No. (%) |    |                  |          |                   |                    |           |                |                       |
|----------------------|----|------------------|----------|-------------------|--------------------|-----------|----------------|-----------------------|
| Dose                 |    | Baseline<br>†††† | Primary  | End of<br>Stage 1 | Open-label<br>Dose | Secondary | End of Stage 2 | 12-month<br>Follow-up |
| 40 mg                | PI | 0 (0)            | 1 (20.0) | ---               | 100-125 mg         | 0 (0)     | 1 (25.0)       | 0 (0)                 |
|                      | SI | 0 (0)            | 0 (0)    |                   |                    | 0 (0)     | 0 (0)          |                       |
|                      | PB | 0 (0)            | 0 (0)    |                   |                    | 0 (0)     | 0 (0)          |                       |
|                      | N  | 6                | 5        |                   |                    | 5         | 4              | 5                     |
| 100 mg               | PI | 6 (66.7)         | 4 (44.4) | 1 (11.1)          | ---                | ---       | ---            | 1 (11.1)              |
|                      | SI | 0 (0)            | 0 (0)    | 0 (0)             |                    |           |                | 0 (0)                 |
|                      | PB | 0 (0)            | 0 (0)    | 0 (0)             |                    |           |                | 0 (0)                 |
|                      | N  | 9                | 9        | 9                 |                    |           |                | 9                     |
| 125 mg               | PI | 7 (53.8)         | 6 (45.4) | 5 (41.7)          | ---                | ---       | ---            | 2 (18.2)              |
|                      | SI | 0 (0)            | 1 (8.3)  | 0 (0)             |                    |           |                | 0 (0)                 |
|                      | PB | 0 (0)            | 0 (0)    | 0 (0)             |                    |           |                | 0 (0)                 |
|                      | N  | 13               | 12       | 12                |                    |           |                | 11                    |

Abbreviations: PI, Positive Ideation on C-SSRS; SI, Serious Ideation on C-SSRS; PB, Positive Behavior on C-

SSRS; N, Number of Participants

† According to the C-SSRS scoring guide, scores of four or five on the suicidal ideation category are considered serious ideation, and scores of one or greater are considered positive behavior or ideation

†† Pre-drug measurement taken day of experimental session prior to drug administration

††† During-drug observation measured at experimental session endpoint, approximately 6 hours after drug administration

†††† Baseline represents measures taken during Preparatory Sessions and before drug administration in Experimental Session 1

**Table S4. Summary of Changes in Amendments**

| <b>Protocol Amendment</b> | <b>Study Design Change</b>                                                                                                  |
|---------------------------|-----------------------------------------------------------------------------------------------------------------------------|
| Amendment 1               | Obfuscation in informed consent – refer to 40 mg as comparator dose, not low dose. No one enrolled in original or A1 (n=28) |
| Amendment 2               | Added optional titration dose available for the second and third sessions of open-label cross over (n=28)                   |
| Amendment 2               | Posttraumatic Growth Inventory added (n = 26)                                                                               |
| Amendment 2               | RBANS and PASAT added as measures (n = 26)                                                                                  |
| Amendment 3               | Addition of a second active-dose group of 100 mg (previously 40 and 125 mg only) (n = 23)                                   |
| Amendment 3               | Expanded exclusion from excluding borderline personality disorders to excluding all personality disorders. (n = 23)         |
| Amendment 3               | Changed definition of therapy team to be more inclusive (n = 23)                                                            |
| Amendment 4               | Increased planned subjects from 17 to 23 (n = 17)                                                                           |
| Amendment 5               | Permitted Active dose 1 (e.g. 100 mg) subjects to receive 125 mg in third MDMA session (n = 14)                             |
| Amendment 6               | (Clarification letter only) Permits addition of three subjects to be randomized                                             |

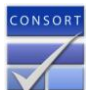

## CONSORT 2010 checklist of information to include when reporting a randomised trial\*

| Section/Topic                    | Item No | Checklist item                                                                                                                                                                              | Reported on page No |
|----------------------------------|---------|---------------------------------------------------------------------------------------------------------------------------------------------------------------------------------------------|---------------------|
| <b>Title and abstract</b>        |         |                                                                                                                                                                                             |                     |
|                                  | 1a      | Identification as a randomised trial in the title                                                                                                                                           | 1                   |
|                                  | 1b      | Structured summary of trial design, methods, results, and conclusions (for specific guidance see CONSORT for abstracts)                                                                     | 4                   |
| <b>Introduction</b>              |         |                                                                                                                                                                                             |                     |
| Background and objectives        | 2a      | Scientific background and explanation of rationale                                                                                                                                          | 5                   |
|                                  | 2b      | Specific objectives or hypotheses                                                                                                                                                           | 5                   |
| <b>Methods</b>                   |         |                                                                                                                                                                                             |                     |
| Trial design                     | 3a      | Description of trial design (such as parallel, factorial) including allocation ratio                                                                                                        | 4, 5                |
|                                  | 3b      | Important changes to methods after trial commencement (such as eligibility criteria), with reasons                                                                                          | Table S4            |
| Participants                     | 4a      | Eligibility criteria for participants                                                                                                                                                       | 6                   |
|                                  | 4b      | Settings and locations where the data were collected                                                                                                                                        | 6                   |
| Interventions                    | 5       | The interventions for each group with sufficient details to allow replication, including how and when they were actually administered                                                       | 6-7                 |
| Outcomes                         | 6a      | Completely defined pre-specified primary and secondary outcome measures, including how and when they were assessed                                                                          | 8                   |
|                                  | 6b      | Any changes to trial outcomes after the trial commenced, with reasons                                                                                                                       | 9, Table 2-5        |
| Sample size                      | 7a      | How sample size was determined                                                                                                                                                              | NA/Pilot study      |
|                                  | 7b      | When applicable, explanation of any interim analyses and stopping guidelines                                                                                                                | NA                  |
| <b>Randomisation:</b>            |         |                                                                                                                                                                                             |                     |
| Sequence generation              | 8a      | Method used to generate the random allocation sequence                                                                                                                                      | 6                   |
|                                  | 8b      | Type of randomisation; details of any restriction (such as blocking and block size)                                                                                                         | 6                   |
| Allocation concealment mechanism | 9       | Mechanism used to implement the random allocation sequence (such as sequentially numbered containers), describing any steps taken to conceal the sequence until interventions were assigned | 6                   |
| Implementation                   | 10      | Who generated the random allocation sequence, who enrolled participants, and who assigned participants to interventions                                                                     | 6                   |
| Blinding                         | 11a     | If done, who was blinded after assignment to interventions (for example, participants, care providers, those                                                                                | 4, 7                |

|                                                      |     |                                                                                                                                                   |                 |
|------------------------------------------------------|-----|---------------------------------------------------------------------------------------------------------------------------------------------------|-----------------|
|                                                      |     | assessing outcomes) and howssssssssssss                                                                                                           |                 |
| Statistical methods                                  | 11b | If relevant, description of the similarity of interventions                                                                                       | 6-7             |
|                                                      | 12a | Statistical methods used to compare groups for primary and secondary outcomes                                                                     | 9               |
|                                                      | 12b | Methods for additional analyses, such as subgroup analyses and adjusted analyses                                                                  | 9               |
| <b>Results</b>                                       |     |                                                                                                                                                   |                 |
| Participant flow (a diagram is strongly recommended) | 13a | For each group, the numbers of participants who were randomly assigned, received intended treatment, and were analysed for the primary outcome    | 10-11           |
|                                                      | 13b | For each group, losses and exclusions after randomisation, together with reasons                                                                  | Tables 2-6      |
| Recruitment                                          | 14a | Dates defining the periods of recruitment and follow-up                                                                                           | 6               |
|                                                      | 14b | Why the trial ended or was stopped                                                                                                                | 6               |
| Baseline data                                        | 15  | A table showing baseline demographic and clinical characteristics for each group                                                                  | Table 1         |
| Numbers analysed                                     | 16  | For each group, number of participants (denominator) included in each analysis and whether the analysis was by original assigned groups           | Tables 2-6      |
| Outcomes and estimation                              | 17a | For each primary and secondary outcome, results for each group, and the estimated effect size and its precision (such as 95% confidence interval) | 10-11           |
|                                                      | 17b | For binary outcomes, presentation of both absolute and relative effect sizes is recommended                                                       | NA              |
| Ancillary analyses                                   | 18  | Results of any other analyses performed, including subgroup analyses and adjusted analyses, distinguishing pre-specified from exploratory         |                 |
| Harms                                                | 19  | All important harms or unintended effects in each group (for specific guidance see CONSORT for harms)                                             | 12-13, Table S1 |
| <b>Discussion</b>                                    |     |                                                                                                                                                   |                 |
| Limitations                                          | 20  | Trial limitations, addressing sources of potential bias, imprecision, and, if relevant, multiplicity of analyses                                  | 15-16           |
| Generalisability                                     | 21  | Generalisability (external validity, applicability) of the trial findings                                                                         | 16              |
| Interpretation                                       | 22  | Interpretation consistent with results, balancing benefits and harms, and considering other relevant evidence                                     | 16              |
| <b>Other information</b>                             |     |                                                                                                                                                   |                 |
| Registration                                         | 23  | Registration number and name of trial registry                                                                                                    | 4, 6            |
| Protocol                                             | 24  | Where the full trial protocol can be accessed, if available                                                                                       |                 |
| Funding                                              | 25  | Sources of funding and other support (such as supply of drugs), role of funders                                                                   | 6, 18           |

\*We strongly recommend reading this statement in conjunction with the CONSORT 2010 Explanation and Elaboration for important clarifications on all the items. If relevant, we also recommend reading CONSORT extensions for cluster randomised trials, non-inferiority and equivalence trials, non-pharmacological treatments, herbal interventions, and pragmatic trials. Additional extensions are forthcoming: for those and for up to date references relevant to this checklist, see [www.consort-statement.org](http://www.consort-statement.org).
